# Supplementary material
Source: Springer Nature journal article supplement (https://www.springermedizin.de/resource/supplementary/12955_2007_377_MOESM4_ESM.pdf/9560268)
Supplement: MOESM4 [file 9560268]

IDUQOL record form (original)

TOTAL NUMBER OF CHIPS USED (TN): \_\_\_\_\_

| <u>LIFE AREA</u>    | <u>WEIGHTING</u>         | <u>RATING</u> | <u>SCORE</u> |
|---------------------|--------------------------|---------------|--------------|
| BEING USEFUL        | _____ chips ÷ TN = _____ | x _____       | = _____      |
| COMMUNITY RESOURCES | _____ chips ÷ TN = _____ | x _____       | = _____      |
| etc.<br>↓           | etc.<br>↓                | etc.<br>↓     | etc.<br>↓    |

IDUQOL record form (revised)

TOTAL NUMBER OF CHIPS USED (TN): \_\_\_\_\_

| <u>LIFE AREA</u>    | <u>IMPORTANCE RATING</u> | <u>IMPORTANCE WEIGHTING</u> | <u>SATISFACTION RATING</u> | <u>QOL SCORE</u> |
|---------------------|--------------------------|-----------------------------|----------------------------|------------------|
| BEING USEFUL        | _____ chips ÷ TN = _____ |                             | x _____                    | = _____          |
| COMMUNITY RESOURCES | _____ chips ÷ TN = _____ |                             | x _____                    | = _____          |
| etc.<br>↓           | etc.<br>↓                |                             | etc.<br>↓                  | etc.<br>↓        |
